# Supplementary material for: Sustainable ammonia synthesis from air by the integration of plasma and electrocatalysis techniques
Source: Royal Society of Chemistry journal article supplement (doi:10.1039/d3qi00915g), 2023-01-01
Supplement: d3qi00915g1.pdf [file d3qi00915g1.pdf]

## Electronic Supplementary Information

### Sustainable ammonia synthesis from the air by the integration of plasma and electrocatalysis techniques

Jun Ding,<sup>‡ab</sup> Wenyi Li,<sup>‡\*ab</sup> Qingqing Chen,<sup>c</sup> Jiafang Liu,<sup>ab</sup> Shu Tang,<sup>ab</sup> Zhiwei Wang,<sup>d</sup>

Longwei Chen,<sup>\*d</sup> and Haimin Zhang<sup>\*ab</sup>

<sup>a</sup> Key Laboratory of Materials Physics, Centre for Environmental and Energy Nanomaterials,  
Anhui Key Laboratory of Nanomaterials and Nanotechnology, Institute of Solid State Physics,  
HFIPS, Chinese Academy of Sciences, Hefei 230031, China.

<sup>b</sup> University of Science and Technology of China, Hefei 230026, China.

<sup>c</sup> Laboratory of Functional Molecular Solids, Ministry of Education, College of Chemistry and  
Materials Science, Anhui Normal University Wuhu, 241002, China.

<sup>d</sup> Institute of Energy, Hefei Comprehensive National Science Center, Hefei 230031, China.

\* Corresponding Authors.

‡ The authors contributed equally to this work.

E-mail: park0301@mail.ustc.edu.cn, chenlw@ie.ah.cn, zhanghm@issp.ac.cn.

## Experimental Section

**Reagents and materials:** Copper acetylacetonate [Cu(acac)<sub>2</sub>, 98%], Platinum (II) acetylacetonate [Pt(acac)<sub>2</sub>, 98%], L-Glutamic acid (95.0%), analytical grade ethanol and isopropanol were purchased from Sinopharm Chemical Reagent Co., Ltd. (Shanghai, China). Oleylamine (approximate C18-content 80-90%) and Dimethyldi-n-octadecylammonium chloride (DODAC, 96.0%) were acquired from Aladdin Industrial Corp. Nafion (5%) was purchased from Sigma Aldrich. Vulcan XC-72R was purchased from Cabot Corporation. Commercial carbon cloth was purchased from Shanghai Hesun Electric Co. Ltd. All available chemicals were used without further purification. All solutions were prepared using deionized water (Millipore Corp, 18.2 MΩ cm).

**Characterization:** TEM images were obtained using JEMARM 200F operating at an accelerating voltage of 200 kV. The crystalline phase of collected samples were characterized through XRD technique on a Philips X'Pert Pro X-ray diffractometer with Cu Kα radiation (Kα= 0.15418 nm). X-ray photoelectron spectroscopy (XPS) spectra were carried out on ESCALab MKII with Al Kα radiation. The binding energies were calibrated by C 1s peak at 284.8 eV as a reference. Fourier transform infrared (FT-IR) spectra of samples were recorded on Thermo Nicolet NEXUS FT-IR spectrophotometer at room temperature. The content of each element in the catalysts was determined by the inductively coupled plasma mass spectrometry (ICP-MS, 710-ES, Varian). The UV-Vis absorption spectra were carried out on UV-Vis spectrophotometer (SHIMADZU UV-2700). Electron Spin Resonance (ESR)

measurement was conducted by Bruker EMX plus 10/12 (equipped with Oxford ESR910 Liquid Helium cryostat). The H<sub>2</sub> content was determined by online gas chromatography (GC-9790Plus, FULI INSTRUMENTS) thermal conductivity detector (TCD).

### Calculation of energy requirement (ER):

The energy requirement (ER) was calculated as follows:

$$ER_{\text{totle}} = ER_{\text{plasma}} + ER_{\text{electro}} \quad (\text{S1})$$

$$ER_{\text{plasma}} = (P_G + P_M \times R_d) \times t_{\text{plasma}} / \{ (c_{\text{NO}_2^-}) \times V_{\text{ab}} \} \quad (\text{S2})$$

$$ER_{\text{electro}} = P_{\text{electro}} \times (n_{\text{NH}_3} / R_{\text{NH}_3}) \quad (\text{S3})$$

Where  $ER_{\text{totle}}$  is the total energy requirement (kWh mol<sub>NH<sub>3</sub></sub><sup>-1</sup>),  $ER_{\text{plasma}}$  is the energy requiremen (kWh mol<sup>-1</sup>) which convert air into NO<sub>x</sub><sup>-</sup> by plasma,  $ER_{\text{electro}}$  is the energy requiremen (kWh mol<sup>-1</sup>) which convert NO<sub>2</sub><sup>-</sup> into NH<sub>3</sub> by electrocatalysis.  $P_G$  is the gliding arc power (400 W),  $P_M$  is the microwave power (960 W),  $R_d$  is the duty cycle of pulse modulation (1/2),  $t_{\text{plasma}}$  is the plasma treatment time (h).  $c_{\text{NO}_2^-}$  is the concentration of NO<sub>2</sub><sup>-</sup> (mol mL<sup>-1</sup>) and  $V_{\text{ab}}$  is the volume of absorption liquid (200 mL).  $P_{\text{electro}}$  is the actual electrocatalysis power (0.004 W),  $n_{\text{NH}_3}$  is the molar mass (mol) of NH<sub>3</sub>,  $R_{\text{NH}_3}$  is the ammonia production rate of the electrocatalytic reaction (mol h<sup>-1</sup>).

**Determination of NO<sub>2</sub><sup>-</sup>:** 20 g of p-aminobenzenesulfonamide was added to a mixed solution of 250 mL of water and 50 mL of phosphoric acid, and then 1 g of N-(1-naphthyl)-ethylenediamine dihydrochloride was dissolved in the above solution. Finally, the above solution was transferred to a 500 mL volumetric flask and diluted to the mark. 0.5 mL

electrolyte was taken out from the electrolytic cell and diluted to 10 mL with H<sub>2</sub>O. Next, 0.2 mL color reagent was added into the above mentioned 10 mL solution. After shaking and standing for 30 minutes, the absorbance measurements were performed at wavelength of 540 nm. The concentration-absorbance curves were calibrated using standard KNO<sub>2</sub> solutions with a series of concentrations in 1.0 M KOH solution and the obtained calibration curve ( $y=3.183x+0.003$ ,  $R^2=0.999$ ) shown in Fig. S3 was used to calculate the produced NO<sub>2</sub><sup>-</sup>-N concentration.

**Determination of NO<sub>3</sub><sup>-</sup>:** The possible produced NO<sub>3</sub><sup>-</sup> was detected by ion-chromatography (Wayeal, IC6000) measurement. In detail, 1.0 mL electrolyte was injected into the chamber for separation. The concentration-peak area curves were calibrated using standard KNO<sub>3</sub> solutions with a series of concentrations in 1.0 M KOH solution, in which the peak appeared at a retention time of 13.12 min. The obtained calibration curve ( $y=28.343x+0.342$ ,  $R^2=0.998$ ) shown in Fig. S4 was used to calculate the NO<sub>3</sub><sup>-</sup> concentration.

In addition to this method, the possible produced NO<sub>3</sub><sup>-</sup> was detected by ultraviolet spectroscopy. For testing, 10 mL of electrolyte was transferred to colorimetric tube with, 200 μL of 1.0 M HCl and 200 μL of 0.8 wt % sulfamic acid solution. The UV-Vis absorption spectrum was detected at a wavelength of 220 nm and 275 nm after maintaining at room temperature for 20 min. The final absorbance is calculated using the following formula:  $A=A_{220\text{nm}}-2A_{275\text{nm}}$ . The obtained calibration curve was used to calculate the nitrate concentration. The concentration-absorbance curves were calibrated using standard KNO<sub>3</sub>

solutions with a series of concentrations in 1.0 M KOH solution and the obtained calibration curve ( $y=0.060x+0.014$ ,  $R^2=0.997$ ) shown in Fig. S5 was used to calculate the produced  $\text{NO}_3^-$  concentration.

**Determination of ammonia:** Concentration of the produced ammonia was spectrophotometrically detected by the indophenol blue method. Briefly, 5.0 g sodium potassium tartrate and 5.0 g sodium salicylate were dissolved in 100.0 mL of 1.0 M sodium hydroxide to prepare the chromogenic reagent (reagent A). 5 mL sodium hypochlorite (10% ~ 15% effective chlorine) was added to deionized water to dilute to 50 mL to prepare the oxidizing reagent (reagent B) The catalytic reagent (reagent C) was prepared by sodium 0.5 g nitroferricyanide dissolved in 50 mL deionized water.

To quantitatively determine the amount of ammonia, 0.5 mL of diluted sample solution was added to a test tube and volume it to 10 mL with deionized water, then 0.5 mL reagent A, 0.2 mL reagent B and 0.20 mL reagent C were successively added, respectively. Following mixing and left-standing for 1 h the UV-Vis absorption spectrum was detected at a wavelength of 697.5 nm at room temperature. The concentration-dependent absorption spectra were calibrated using standard ammonia chloride solutions with varying concentration. The obtained calibration curve ( $y=1.033x+0.015$ ,  $R^2=0.999$ ) shown in Fig. S12 was used to calculate the produced ammonia concentration.

**Determination of hydrazine:** The possible produced hydrazine was detected through the Watt and Chrisp method. Briefly, 30 mL of HCl, 5.99 g of para-(dimethylamino)

benzaldehyde and 300 mL of ethanol were mixed and used as a sensitive chromogenic reagent. Then, 0.1 mL of solution product was mixed with 5 mL of the chromogenic reagent and 10 mL HCl (1.0 M) at room temperature. After standing for 20 min, the UV-Vis absorption spectrum was measured at a wavelength of 455 nm. The obtained calibration curve ( $y=0.019x+0.014$ ,  $R^2=0.999$ ) shown in Fig. S13 was used to calculate the  $N_2H_4 \cdot H_2O$  concentration.

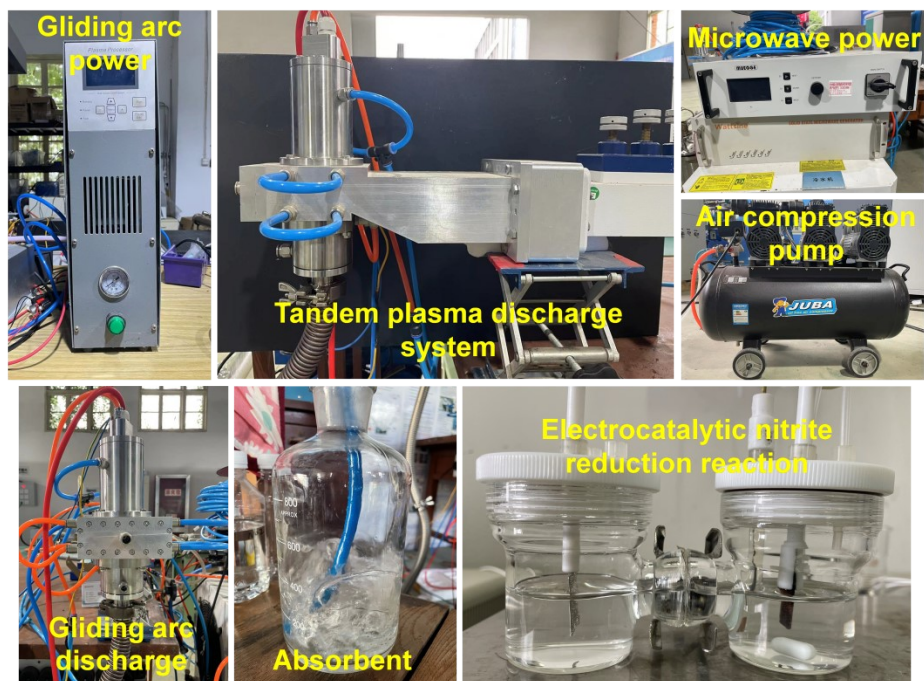

**Fig. S1** Photograph of the self-assembly non-thermal plasma (NTP) system.

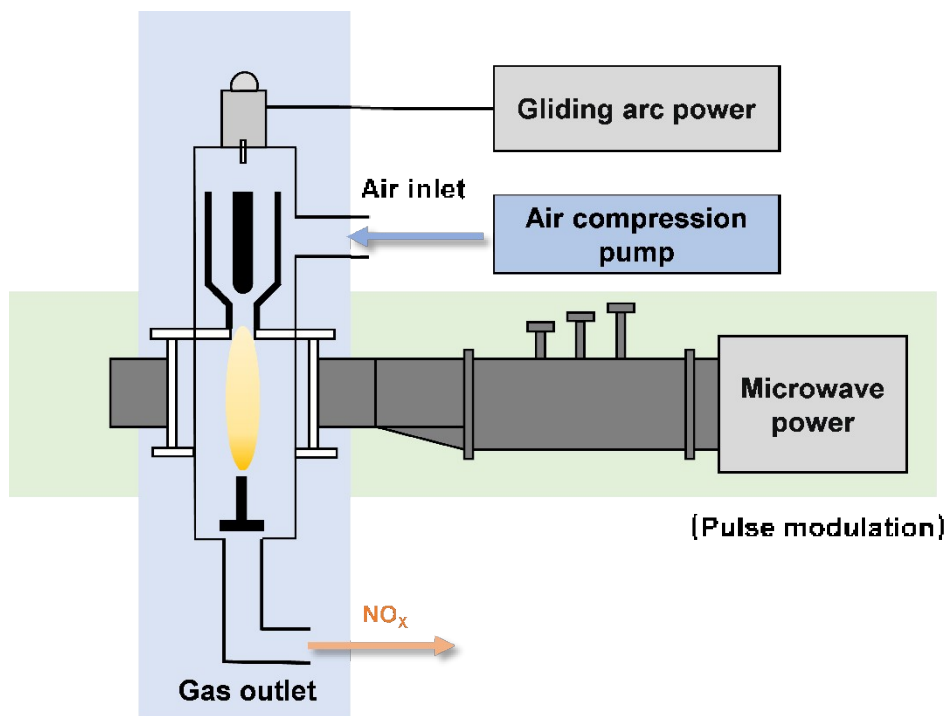

**Fig. S2** Schematic illustration of the tandem plasma reactor.



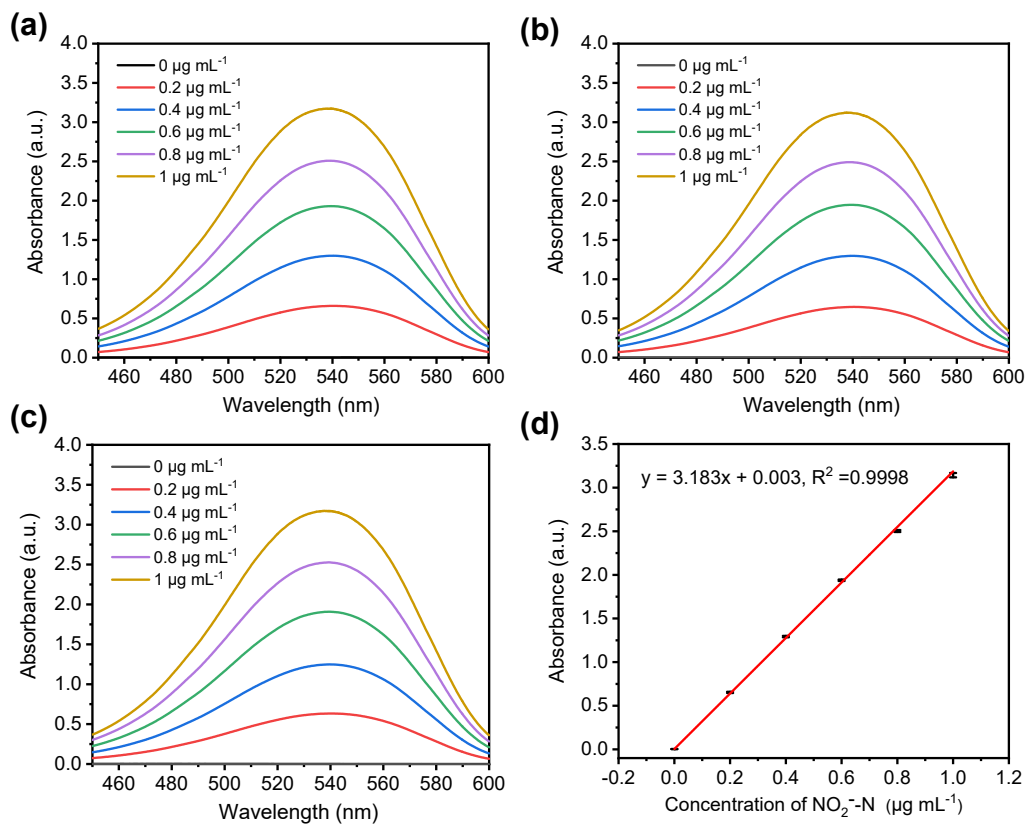

**Fig. S3** (a-c) UV-Vis absorption spectra of various  $\text{NO}_2^-$ -N concentrations for three repeated experiments. (d) Calibration curve used for estimation of  $\text{NO}_2^-$ -N concentration.

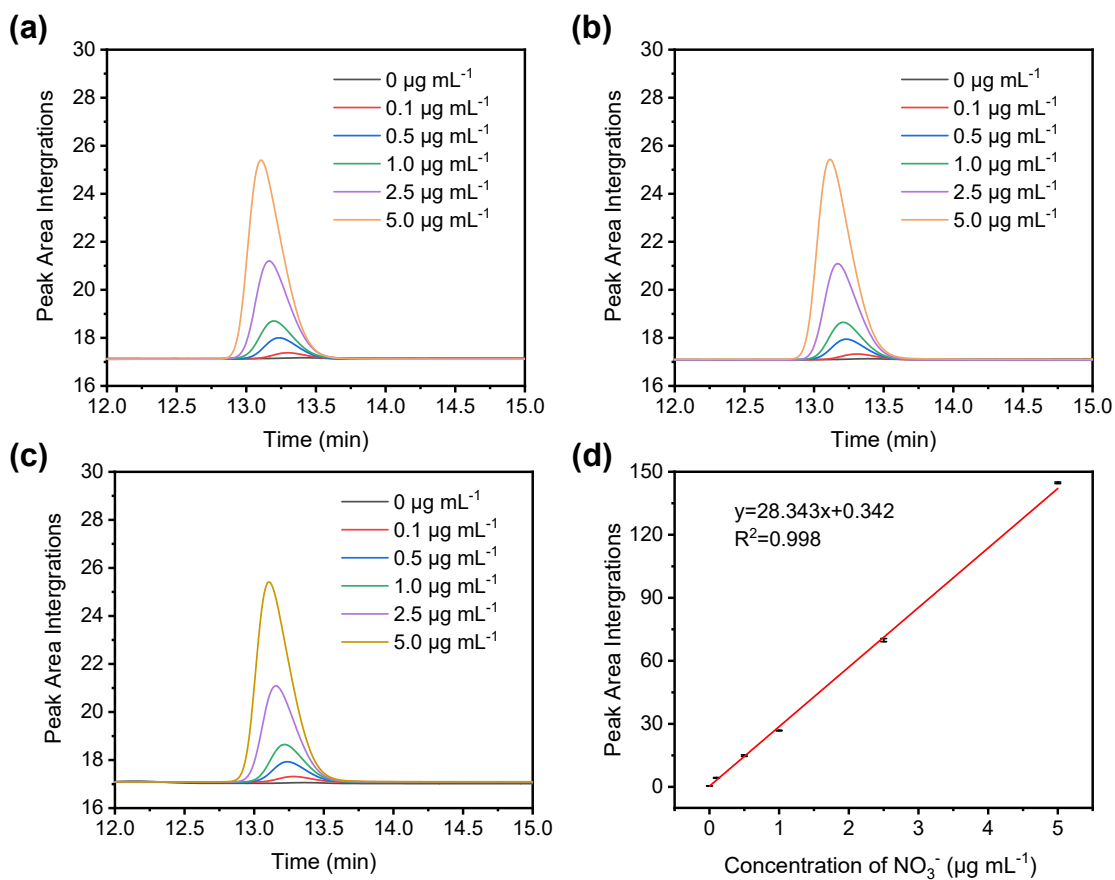

**Fig. S4** (a-c) Ion chromatogram spectra of the standard solutions with different concentrations of  $\text{NO}_3^-$  for three replicated tests. (d) The calibration curve used for calculation of  $\text{NO}_3^-$  concentration.

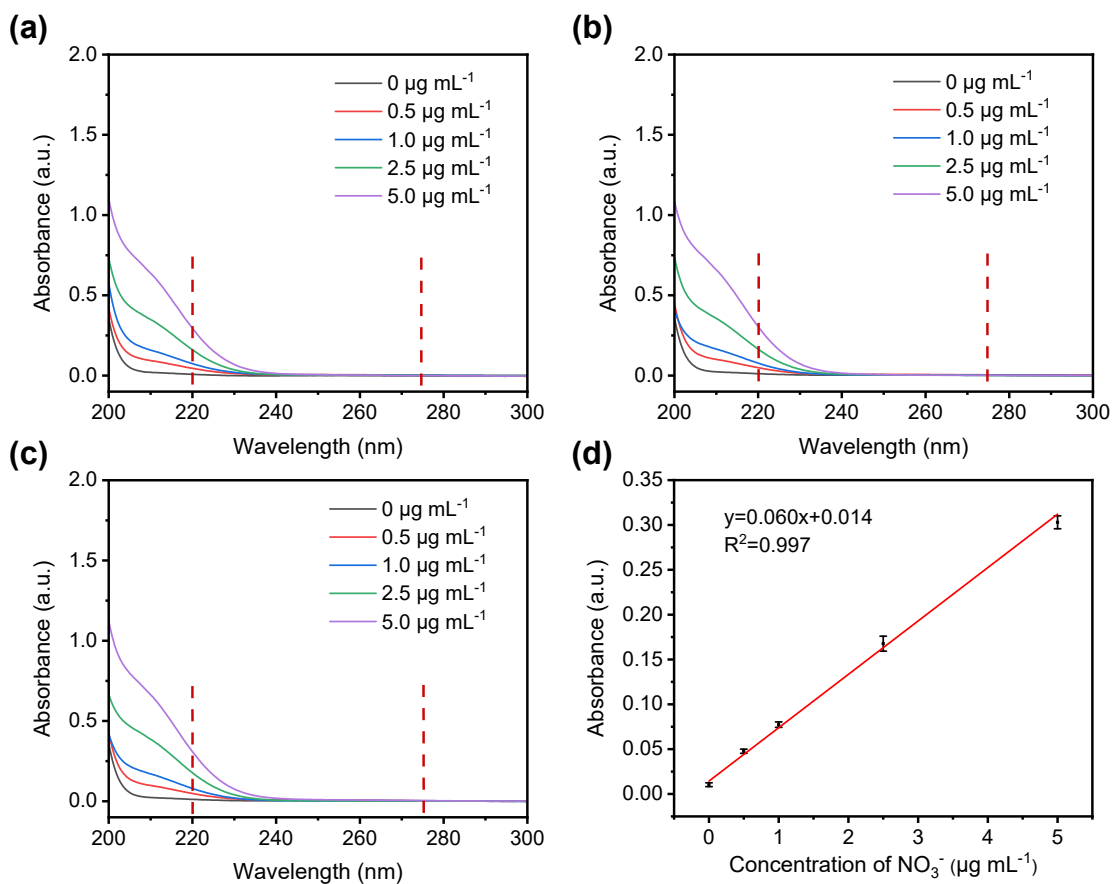

**Fig. S5** (a-c) UV-Vis absorption spectra of the standard solutions with different concentrations of  $\text{NO}_3^-$  for three replicated tests. (d) The calibration curve used for calculation of  $\text{NO}_3^-$  concentration.

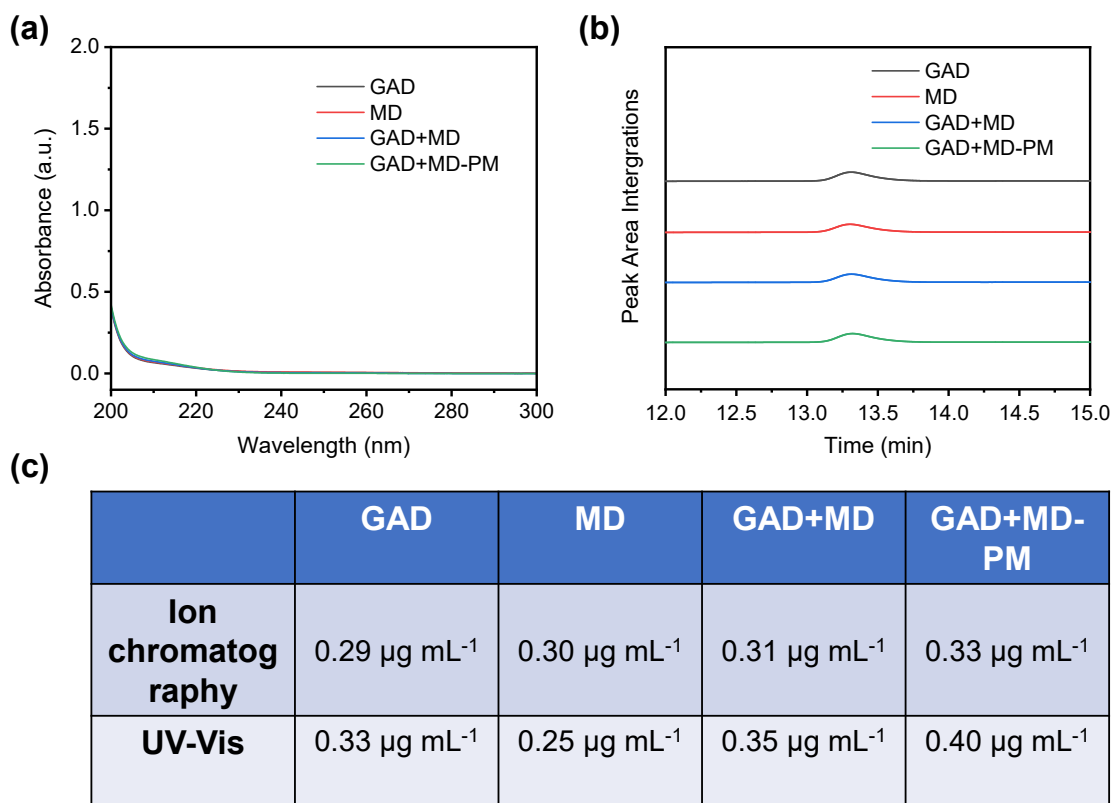

**Fig. S6** (a) UV-Vis absorption spectra and (b) ion chromatogram spectra of collected samples obtained at different plasma-activation modes for  $\text{NO}_3^-$  detection. (c) The comparison table of  $\text{NO}_3^-$  concentration of the two detection methods under different plasma discharge modes.

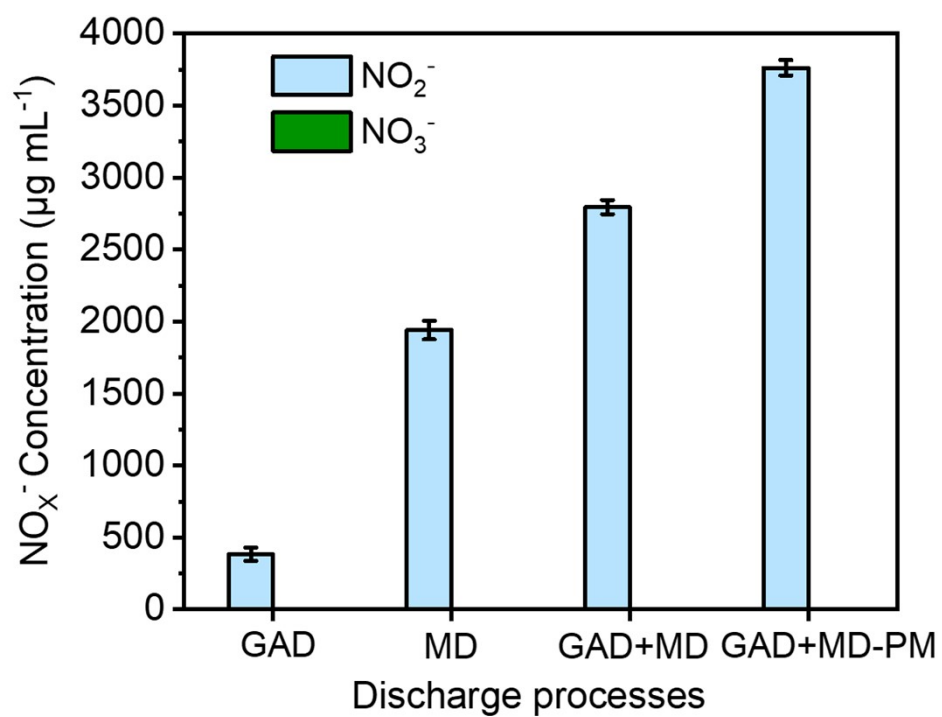

**Fig. S7** Comparison of NO<sub>2</sub><sup>-</sup> and NO<sub>3</sub><sup>-</sup> concentration under different plasma discharge modes.

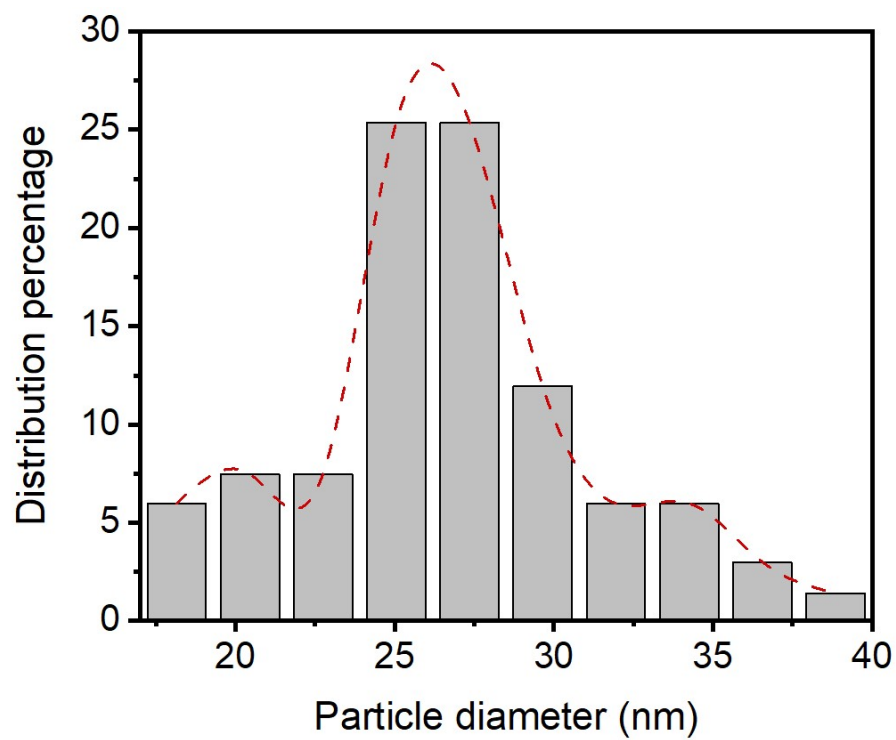

**Fig. S8** The particle size distributions of PtCu HPs.

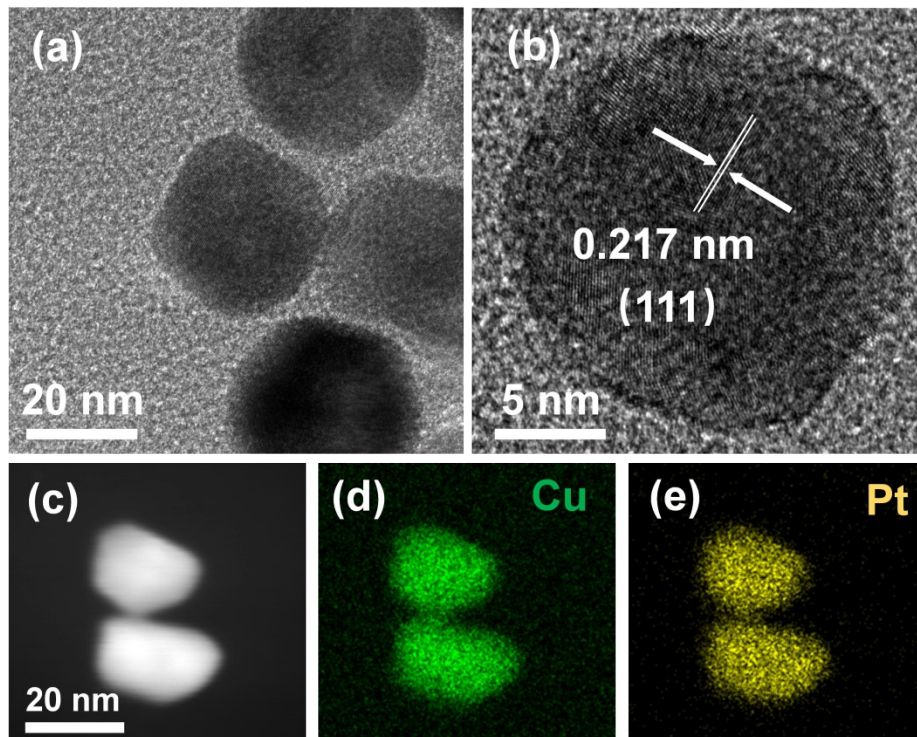

**Fig. S9** (a) Low-magnification TEM image, (b) high-resolution TEM image of PtCu NPs, (c-e) HAADF-STEM image and corresponding element mappings of PtCu NPs.

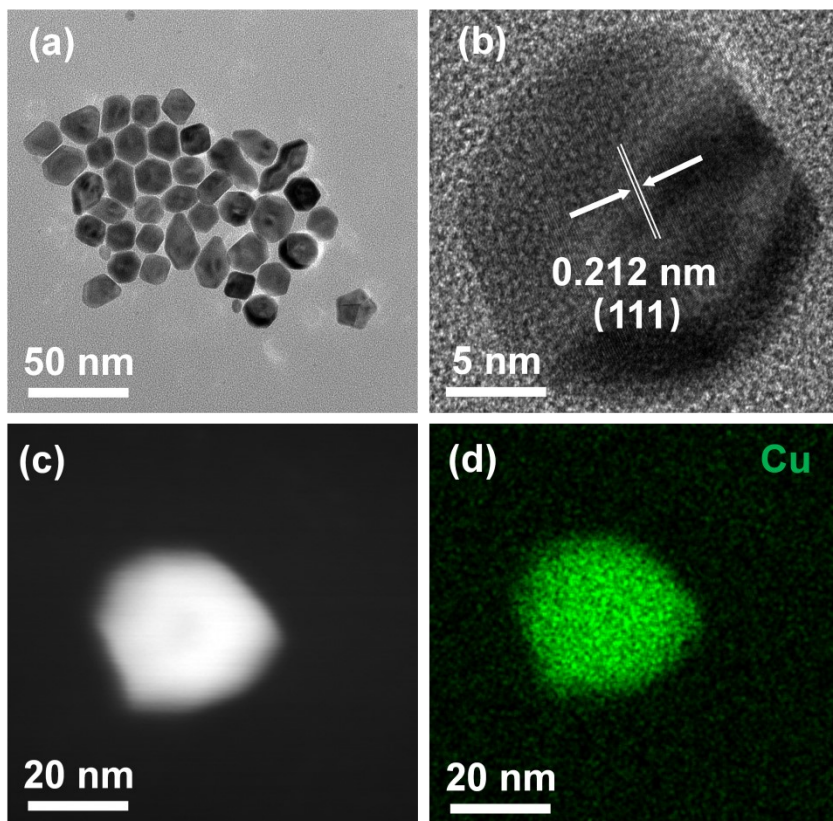

**Fig. S10** (a) Low-magnification TEM image, (b) high-resolution TEM image of Cu NPs, (c-d) HAADF-STEM image and corresponding element mappings of Cu NPs.



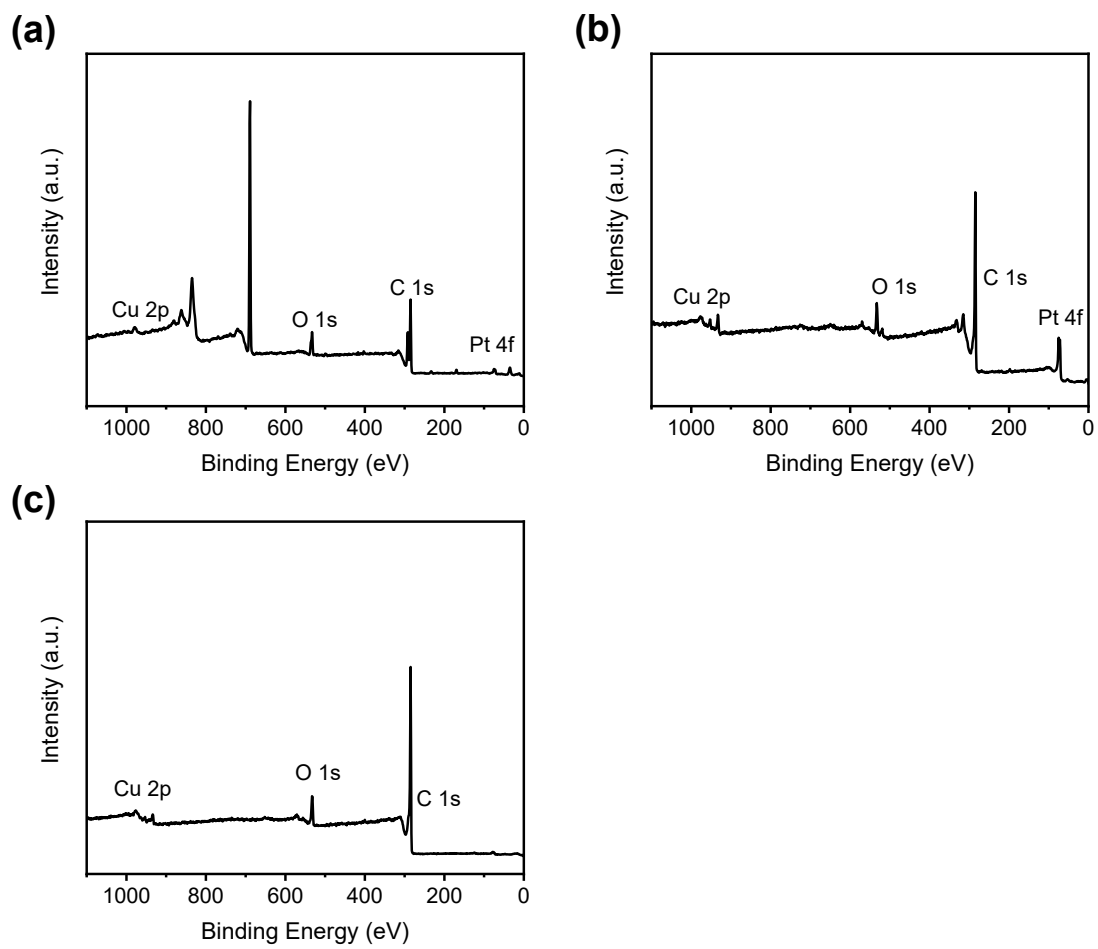

**Fig. S11** The surface survey XPS spectra of (a) PtCu HPs, (b) PtCu NPs and (c) Cu NPs.

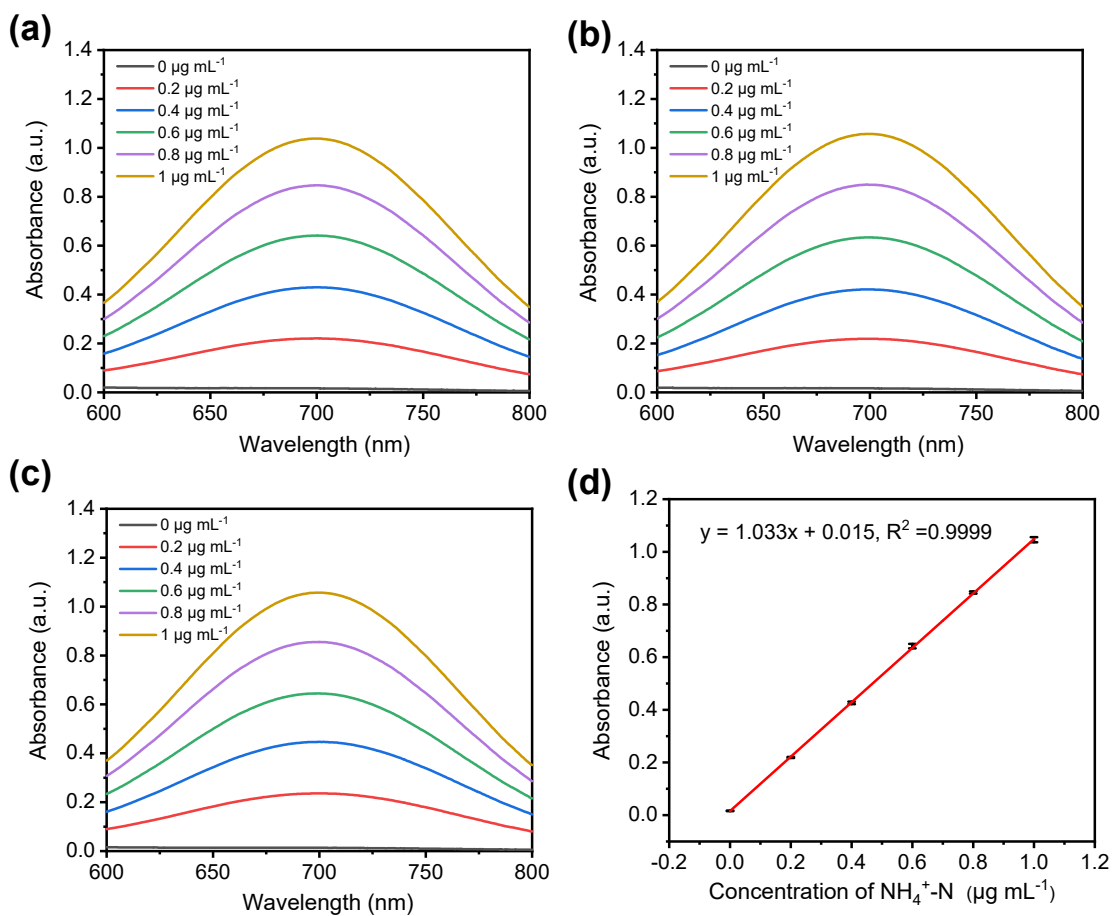

**Fig. S12** (a-c) UV-Vis absorption spectra of various  $\text{NH}_4^+\text{-N}$  concentrations for three repeated experiments. (d) Calibration curve used for estimation of  $\text{NH}_4^+\text{-N}$  concentration.

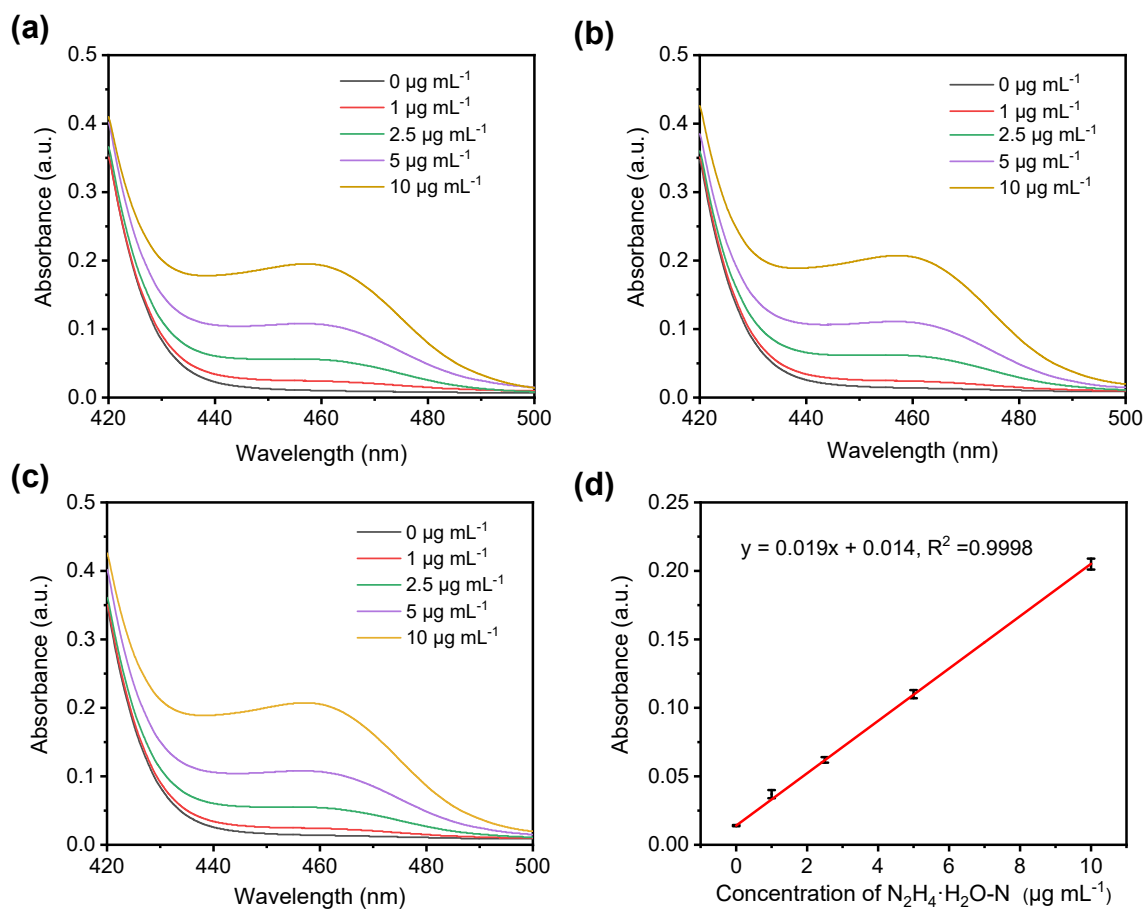

**Fig. S13** (a-c) UV-Vis absorption spectra of the various concentrations of  $N_2H_4 \cdot H_2O$  for three replicated tests. (d) The calibration curve used for calculation of  $N_2H_4 \cdot H_2O$  concentration.

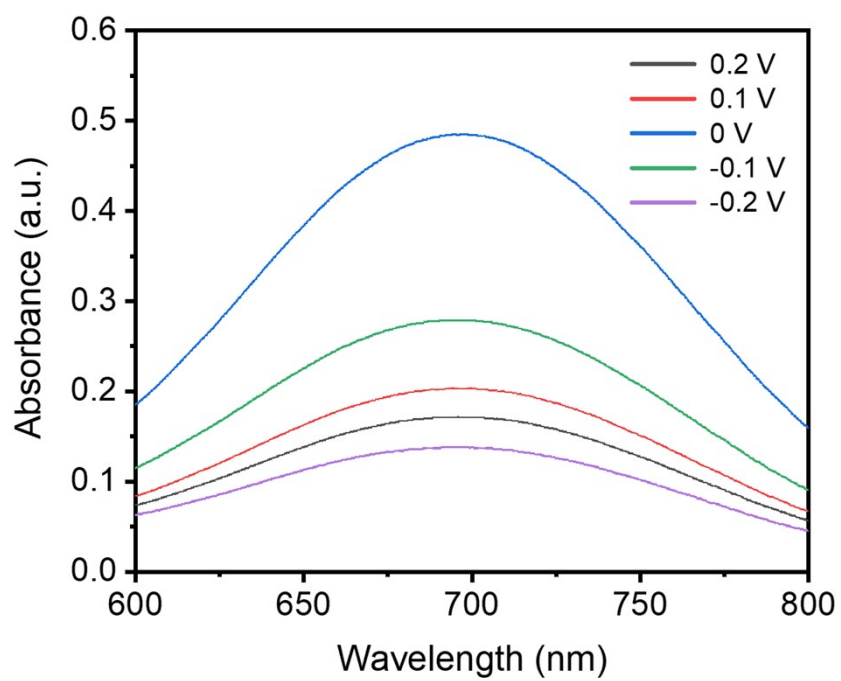

**Fig. S14** UV-Vis absorption spectra of  $\text{NH}_4^+\text{-N}$  concentration at different applied potentials.

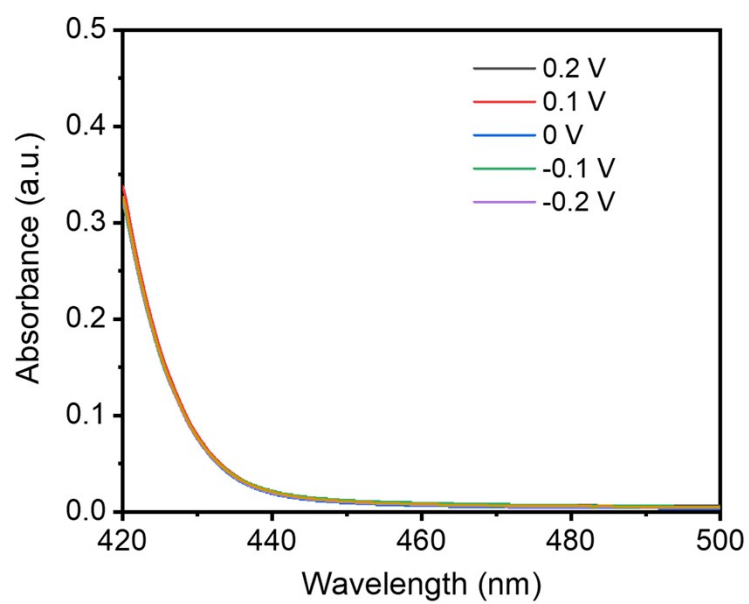

**Fig. S15** UV-Vis absorption spectra of collected samples obtained at different applied potentials for  $\text{N}_2\text{H}_4 \cdot \text{H}_2\text{O}$  detection.

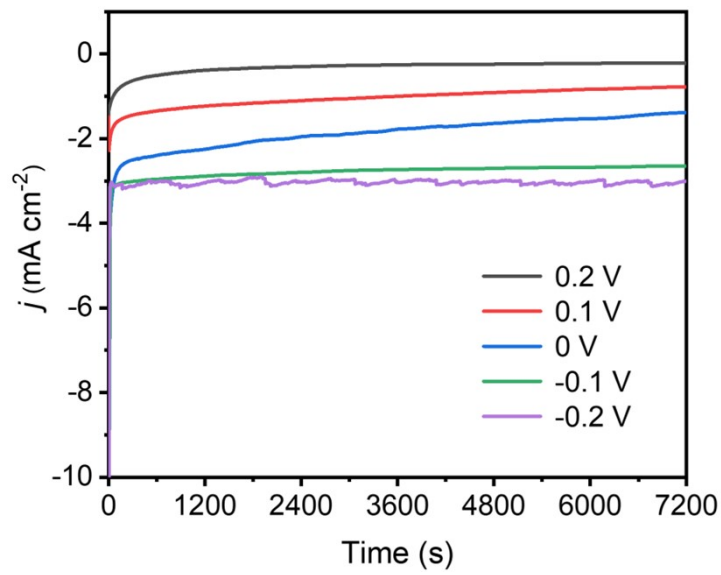

**Fig. S16** Chronoamperometry curves in plasma treated 1.0 M KOH for 2 h of  $\text{eNO}_2\text{-RR}$  at different applied potentials.

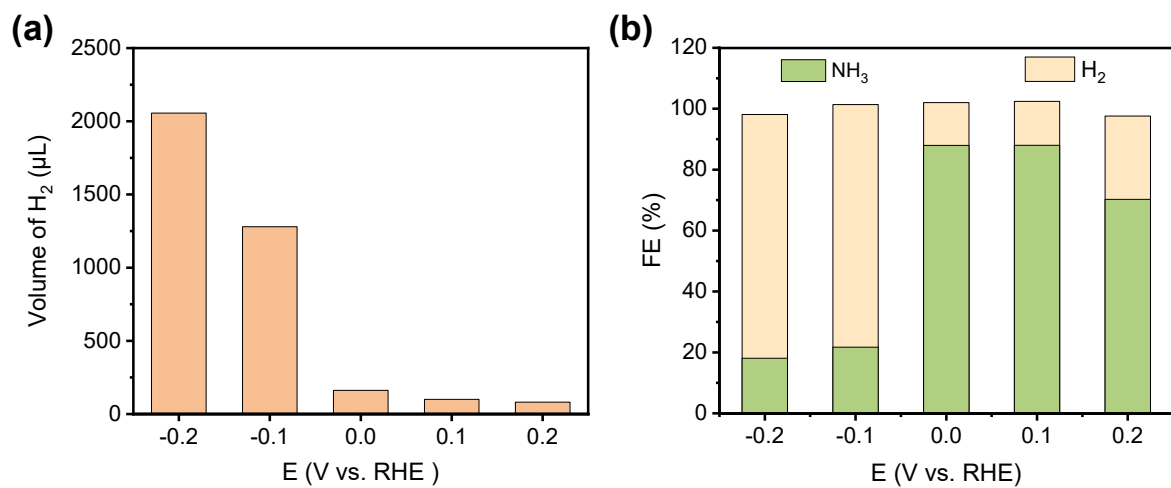

**Fig. S17** (a) Volume of  $H_2$  detected by gas chromatography method at different applied potentials. (b) FEs of different products at different applied potentials.

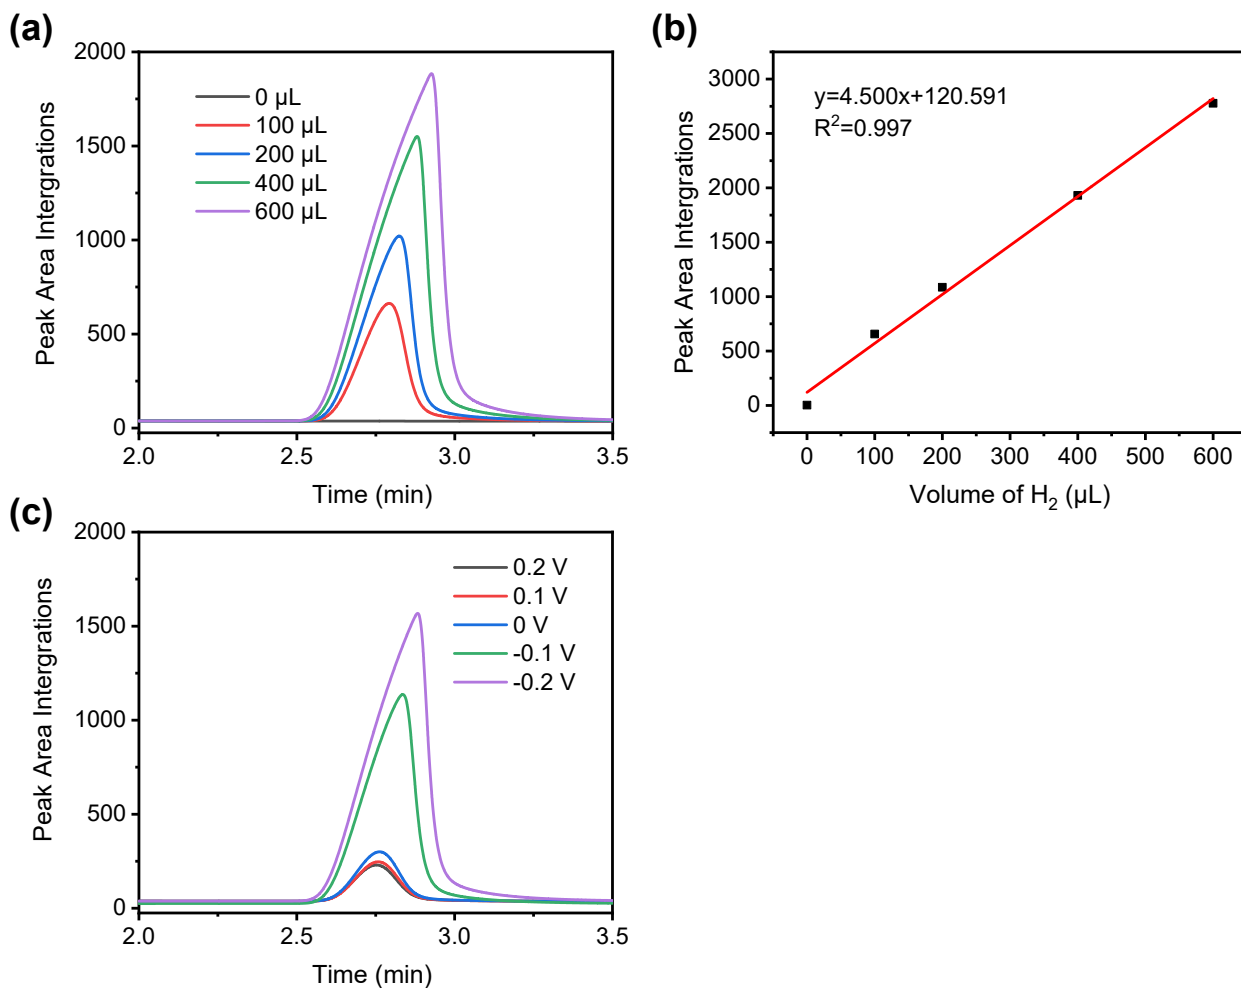

**Fig. S18** (a) Gas chromatography spectra of the various volume of H<sub>2</sub>. (b) The calibration curve used for calculation of H<sub>2</sub> volume. (c) Gas chromatography spectra of H<sub>2</sub> volume at different applied potentials.



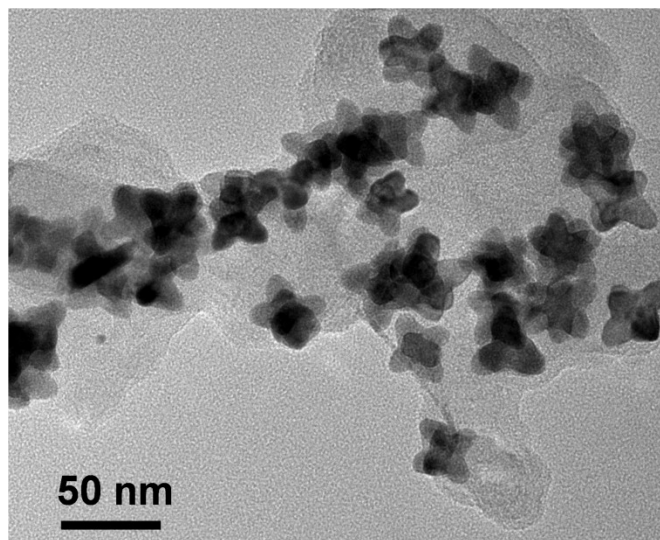

**Fig. S19** TEM image of the PtCu HPs catalyst after long-time stability test.

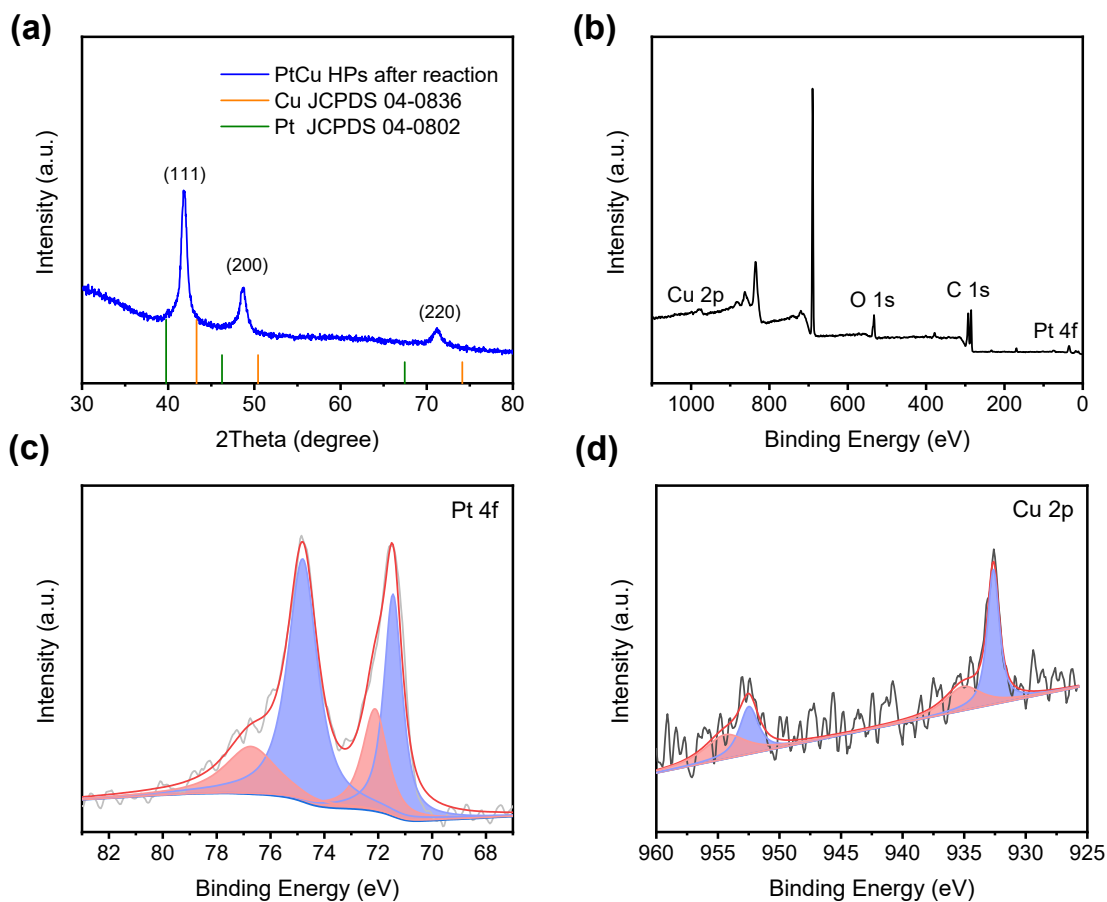

**Fig. S20** (a) XRD pattern of PtCu HPs after long-time stability test. (b) Surface survey XPS spectrum of PtCu HPs. High-resolution (c) Pt 4f and (d) Cu 2p spectra of PtCu HPs after long-time stability test.

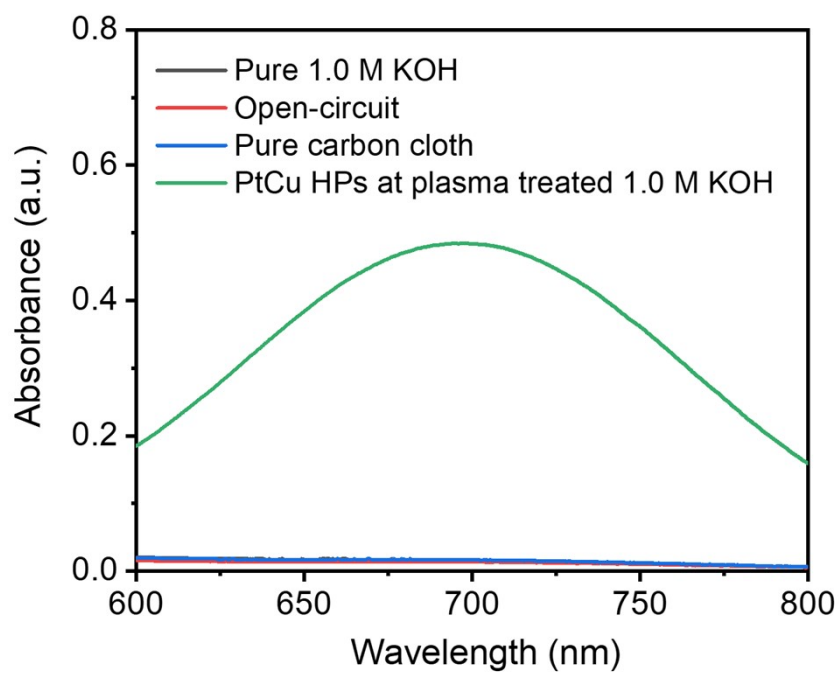

**Fig. S21** UV-Vis absorption spectra of collected samples under different control conditions for  $\text{NH}_3$  detection.

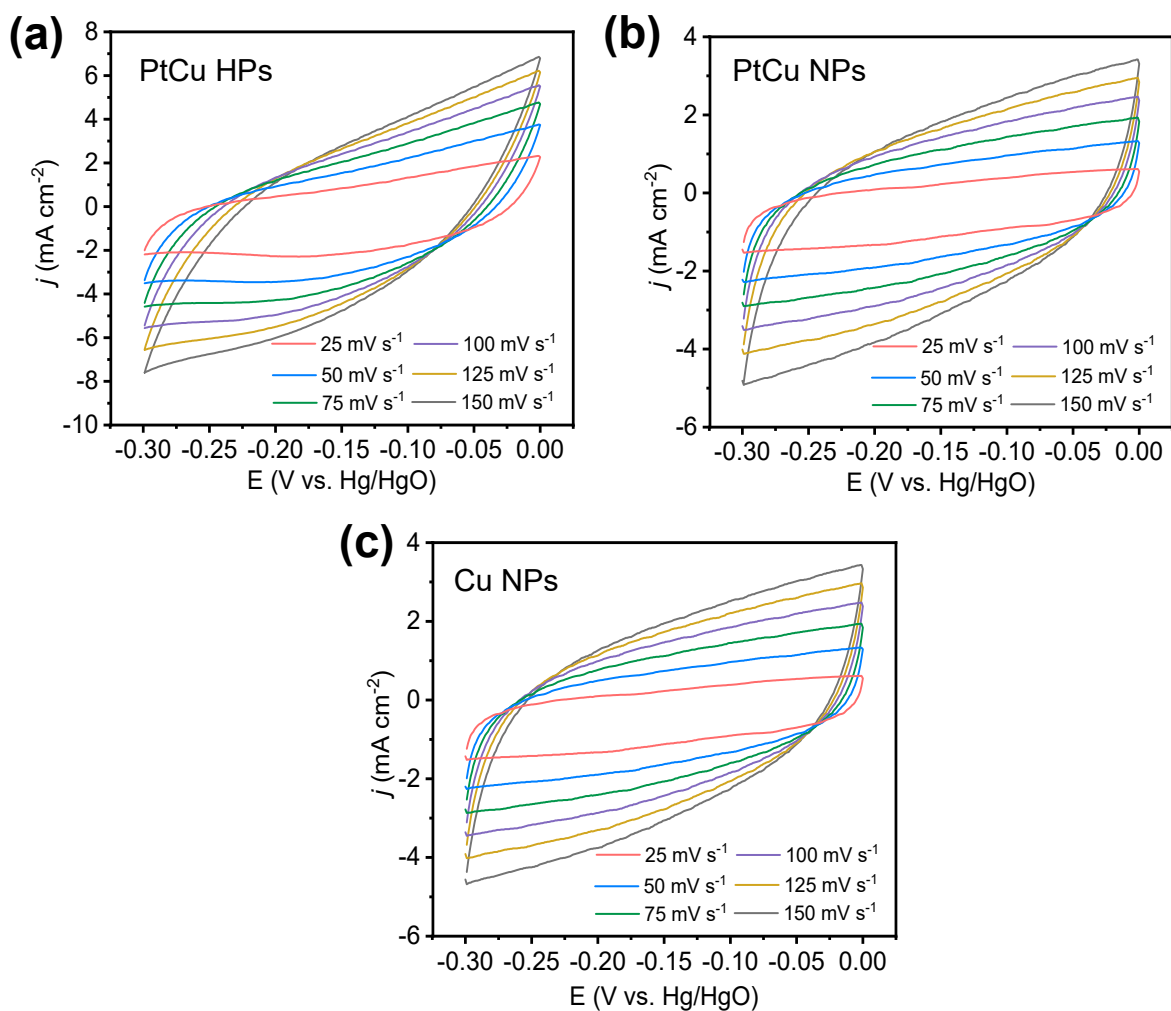

**Fig. S22** Cyclic voltammetry curves of (a) PtCu HPs, (b) PtCu NPs and (c) Cu NPs with various scan rates (25, 50, 75, 100, 125, 150  $\text{mV s}^{-1}$ ) in the region of 0 V to -0.30 V (vs. Hg/HgO).

**Tab. S1** Comparison results of our work with recently reported works for plasma generated  $\text{NO}_x^-$ .

| Plasma                                         | Feeding gas                    | Gas flowing rate        | Absorption liquid                             | $\text{NO}_x^-$ yield rate                                 | Ref.      |
|------------------------------------------------|--------------------------------|-------------------------|-----------------------------------------------|------------------------------------------------------------|-----------|
| Gliding arc and microwave tandem plasma        | Air                            | 45 L min <sup>-1</sup>  | 1.0 M KOH (200 mL)                            | 98.16 mmol h <sup>-1</sup>                                 | This work |
| Nanosecond pulsed spark plasma                 | N <sub>2</sub> +O <sub>2</sub> | 40 mL min <sup>-1</sup> | 0.1 M KOH (100 mL)                            | 1.35 mmol h <sup>-1</sup>                                  | 1         |
| Pulsed high voltage discharge plasma           | N <sub>2</sub> +O <sub>2</sub> | 30 mL min <sup>-1</sup> | 0.1 M KOH (30 mL)                             | 0.468mmol h <sup>-1</sup>                                  | 2         |
| Spark discharge plasma                         | Air                            | 50 mL min <sup>-1</sup> | 0.1 M KOH (30 mL)                             | 0.045 mmol h <sup>-1</sup> (NO <sub>2</sub> <sup>-</sup> ) | 3         |
| Double reactor glow and spark discharge plasma | Air                            | 2 L min <sup>-1</sup>   | 10 mM H <sub>2</sub> SO <sub>4</sub> (100 mL) | 2.97 mmol h <sup>-1</sup>                                  | 4         |
| Rotating gliding arc plasma jet                | Air                            | 7 L min <sup>-1</sup>   | 0.1 M KOH (100 mL)                            | 9.06 mmol h <sup>-1</sup>                                  | 5         |
| Jet-type plasma with Ti bubbler                | Air                            | 25 L min <sup>-1</sup>  | 1.0 M NaOH (500 mL)                           | 55.29 mmol h <sup>-1</sup>                                 | 6         |
| Gliding arc plasma                             | Air                            | 9 L min <sup>-1</sup>   | 0.1 M KOH (100 mL)                            | 28 mmol h <sup>-1</sup> (NO <sub>2</sub> <sup>-</sup> )    | 7         |

**Tab. S2** The comparable results of our work and other recently reported eNO<sub>3</sub><sup>-</sup>RR, eNO<sub>2</sub><sup>-</sup>RR and eNRR electrocatalysts.

| Catalysts                             | Conditions                                                                     | NH <sub>3</sub> Yield Rate                                            | FE (%)     | Ref.      |
|---------------------------------------|--------------------------------------------------------------------------------|-----------------------------------------------------------------------|------------|-----------|
| PtCu HPs                              | Plasma treated 1.0 M KOH                                                       | 166.02 μg h <sup>-1</sup> mg <sup>-1</sup><br>(0 V vs. RHE)           | 84.37      | This work |
| Ni <sub>3</sub> B@NiB <sub>2.74</sub> | 0.10 M KOH + 100 mM NO <sub>2</sub> <sup>-</sup>                               | 198.3 mmol h <sup>-1</sup> cm <sup>-2</sup><br>(-0.3V vs. RHE)        | ~100       | 1         |
| Cu NWs                                | Plasma treated 10 mM H <sub>2</sub> SO <sub>4</sub>                            | 45 nmol s <sup>-1</sup> cm <sup>-2</sup><br>(-0.5V vs. RHE)           | ~100       | 4         |
| Co SAs/N-C                            | Plasma treated 0.1 M KOH                                                       | ~3.0 mg h <sup>-1</sup> cm <sup>-2</sup><br>(-0.63V vs. RHE)          | ~62        | 5         |
| Ru-Cu NW/CF                           | 0.1 M PBS + 500 ppm NO <sub>2</sub> <sup>-</sup>                               | 211.73 mg h <sup>-1</sup> cm <sup>-2</sup><br>(-0.6 V vs. RHE)        | 94.1       | 8         |
| Pd/CuO NOs                            | 0.1 M K <sub>2</sub> SO <sub>4</sub> + 0.01 M KNO <sub>2</sub>                 | 906.4 μg h <sup>-1</sup> mg <sup>-1</sup><br>(-1.5 V vs. SCE)         | 91.8       | 9         |
| MnO <sub>2</sub> NA/TM                | 0.1 M NaOH + 0.1 M NaNO <sub>2</sub>                                           | 6300 μg h <sup>-1</sup> mg <sup>-1</sup><br>(-0.8 V vs. RHE)          | 65.4       | 10        |
| Ni <sub>2</sub> P nanosheet array     | 0.1 M PBS+200 ppm NO <sub>2</sub> <sup>-</sup>                                 | 2692.2 ± 92.1 μg h <sup>-1</sup> cm <sup>-2</sup><br>(-0.3 V vs. RHE) | 90.2 ± 3.0 | 11        |
| CoB@TiO <sub>2</sub> /TP              | 0.1 M Na <sub>2</sub> SO <sub>4</sub> +200 ppm NaNO <sub>2</sub> -N            | 233.1 μmol h <sup>-1</sup> cm <sup>-2</sup><br>(-0.7 V vs. RHE)       | 95.2       | 12        |
| NiFe LDH/Vulcan                       | 0.5 M Na <sub>2</sub> SO <sub>4</sub> + 50 mM NaNO <sub>2</sub>                | 351 μg h <sup>-1</sup> mg <sup>-1</sup><br>(-1.0 V vs. RHE)           | 85         | 13        |
| PdCu/Cu <sub>2</sub> O                | 0.5 M Na <sub>2</sub> SO <sub>4</sub> +100 ppm NO <sub>3</sub> <sup>-</sup> -N | 0.19 mmol h <sup>-1</sup> cm <sup>-2</sup><br>(-0.4 V vs. RHE)        | 94.32      | 14        |
| Cu-N-C (SAC)                          | 0.05 M K <sub>2</sub> SO <sub>4</sub> +50 ppm NO <sub>3</sub> <sup>-</sup>     | 1.15 μg h <sup>-1</sup> mg <sup>-1</sup><br>(-0.95 V vs. RHE)         | 19.5       | 15        |
| Fe-N-C (SAC)                          | 0.1 M K <sub>2</sub> SO <sub>4</sub> + 0.5 M NO <sub>3</sub> <sup>-</sup>      | 5245 μg h <sup>-1</sup> mg <sup>-1</sup><br>(-0.66 V vs. RHE)         | 75         | 16        |
| PTCDA/O-Cu                            | 0.1 M PBS +500 ppm NO <sub>3</sub> <sup>-</sup>                                | 33.54 μg h <sup>-1</sup> mg <sup>-1</sup><br>(-0.40 V vs. RHE)        | 77         | 17        |
| Cu (111) nanosheets                   | 0.1 M KOH + 10 mM KNO <sub>3</sub>                                             | 390.1 μg h <sup>-1</sup> mg <sup>-1</sup><br>(-0.15 V vs. RHE)        | 99.7       | 18        |
| Strained Ru                           | 1 M KOH + 1.0 M                                                                | 5.56 mol g <sup>-1</sup> h <sup>-1</sup>                              | ~100%      | 19        |

| nanoclusters                         | KNO <sub>3</sub>                                                                  | (-0.2 V vs. RHE)                                                               |                          |    |
|--------------------------------------|-----------------------------------------------------------------------------------|--------------------------------------------------------------------------------|--------------------------|----|
| Cu@C                                 | 1 M KOH + 1×10 <sup>-3</sup> M<br>NO <sub>3</sub> <sup>-</sup>                    | 469.5 μg h <sup>-1</sup> cm <sup>-2</sup><br>(-0.9 V vs. RHE)                  | 72                       | 20 |
| RuNi-MOF                             | 0.5 M Na <sub>2</sub> SO <sub>4</sub> +50 ppm<br>NO <sub>3</sub> <sup>-</sup> -N  | 274 mg h <sup>-1</sup> mg <sup>-1</sup><br>(-1.6 V vs. Ag/AgCl)                | 73                       | 21 |
| NiCo <sub>2</sub> O <sub>4</sub> /CC | 0.1 M NaOH + 0.1 M<br>NaNO <sub>3</sub>                                           | 973.2 μmol h <sup>-1</sup> cm <sup>-2</sup><br>(-0.6 V vs. RHE)                | 99<br>(-0.3 V vs RHE)    | 22 |
| BiFeO <sub>3</sub>                   | 0.1 M KOH + 0.1 M<br>KNO <sub>3</sub>                                             | 90.45 mg h <sup>-1</sup> mg <sup>-1</sup><br>(-0.6 V vs. RHE)                  | 96.85                    | 23 |
| Cu/Cu <sub>2</sub> O NWAs            | 0.5 M Na <sub>2</sub> SO <sub>4</sub> +200<br>ppm NO <sub>3</sub> <sup>-</sup> -N | 0.245 mmol h <sup>-1</sup> cm <sup>-2</sup><br>(-0.85 V vs. RHE)               | 95.8<br>(-0.2 V vs RHE)  | 24 |
| Pd <sub>3</sub> Cu <sub>1</sub>      | 1.0 M KOH + N <sub>2</sub>                                                        | 39.9 μg h <sup>-1</sup> mg <sup>-1</sup><br>(-0.25 V vs. RHE)                  | 1.56<br>(-0.05 V vs RHE) | 25 |
| BiNi Alloy                           | 0.1 M Na <sub>2</sub> SO <sub>4</sub> + N <sub>2</sub>                            | 17.5 μg h <sup>-1</sup> mg <sup>-1</sup><br>(-0.3 V vs. RHE)                   | 13.8                     | 26 |
| Fe <sub>SA</sub> -NO-C-900           | 0.1 M HCl + N <sub>2</sub>                                                        | 31.9 μg h <sup>-1</sup> mg <sup>-1</sup><br>(-0.4 V vs. RHE)                   | 11.8                     | 27 |
| NiFe-MOF                             | 0.1 M NaHCO <sub>3</sub> + N <sub>2</sub>                                         | 9.3 μg h <sup>-1</sup> mg <sup>-1</sup><br>(-0.345 V vs. RHE)                  | 11.5                     | 28 |
| Mo <sub>2</sub> C/C                  | 0.5 M Li <sub>2</sub> SO <sub>4</sub> + N <sub>2</sub><br>(pH =2)                 | 11.3 μg h <sup>-1</sup> mg <sup>-1</sup> Mo <sub>2</sub> C<br>(-0.3 V vs. RHE) | 7.8                      | 29 |
| MoS <sub>2</sub> QDs                 | 0.5 M LiClO <sub>4</sub> + N <sub>2</sub>                                         | 39.6 μg h <sup>-1</sup> mg <sup>-1</sup><br>(-0.3 V vs. RHE)                   | 12.9                     | 30 |
| CoS <sub>2</sub> @NC                 | 0.1 M HCl + N <sub>2</sub>                                                        | 17.45 μg h <sup>-1</sup> mg <sup>-1</sup><br>(-0.15 V vs. RHE)                 | 4.6                      | 31 |
| PdRu                                 | 0.1 M HCl + N <sub>2</sub>                                                        | 34.2 μg h <sup>-1</sup> mg <sup>-1</sup><br>(-0.2 V vs. RHE)                   | 2.4                      | 32 |

**Tab. S3** The comparable results of reported NH<sub>3</sub> production rate, energy requirements and CO<sub>2</sub> emissions for the proposed method with H-B technology and other competing emerging technologies.

| <b>Nitrogen fixation method</b>                     | <b>NH<sub>3</sub> production rate (mg/h)</b> | <b>Energy requirement (kWh/kg<sub>NH3</sub>)</b> | <b>CO<sub>2</sub> emissions (t<sub>CO2</sub>/t<sub>NH3</sub>)</b> | <b>Ref.</b> |
|-----------------------------------------------------|----------------------------------------------|--------------------------------------------------|-------------------------------------------------------------------|-------------|
| plasma-electrocatalysis integrated strategy         | 0.166                                        | 551.76                                           | ~0                                                                | This work   |
| Plasma electrolytic                                 | 0.05                                         | 560000                                           | ~0                                                                | 33          |
| Packed-bed DBD                                      | 0.0081                                       | 340                                              | ~0                                                                | 34          |
| DBD jet electrolytic                                | 0.44                                         | 2270                                             | ~0                                                                | 35          |
| Li-intermediary NRR                                 | 0.013                                        | 1731                                             | ~0                                                                | 36          |
| Li-intermediary NRR                                 | 0.48                                         | 1380000                                          | ~0                                                                | 37          |
| eNRR                                                | 0.00135                                      | 37                                               | ~0                                                                | 38          |
| eNRR                                                | 0.0083                                       | 5.5                                              | ~0                                                                | 39          |
| eNRR                                                | 0.0063                                       | 32                                               | ~0                                                                | 40          |
| eNRR                                                | 0.00264                                      | 29.92                                            | ~0                                                                | 41          |
| Fe-cat. (KM1) <sup>a</sup><br>(Haber-Bosch process) | 642.6                                        | 10~13                                            | ~1.5                                                              | 42          |

a. Cat. = 0.2 g, H<sub>2</sub>:N<sub>2</sub>= 3:1, WHSV= 60 000 mL g<sup>-1</sup> h<sup>-1</sup>, T= 400 °C, P= 10 MPa.



## References

1. L. Li, C. Tang, X. Cui, Y. Zheng, X. Wang, H. Xu, S. Zhang, T. Shao, K. Davey and S. Z. Qiao, Efficient nitrogen fixation to ammonia through integration of plasma oxidation with electrocatalytic reduction, *Angew. Chem. Int. Ed. Engl.*, 2021, **60**, 14131-14137.
2. Y. Ren, C. Yu, L. Wang, X. Tan, Z. Wang, Q. Wei, Y. Zhang and J. Qiu, Microscopic-level insights into the mechanism of enhanced NH<sub>3</sub> synthesis in plasma-enabled cascade N<sub>2</sub> oxidation–electroreduction system, *J. Am. Chem. Soc.*, 2022, **144**, 10193-10200.
3. S.-L. Meng, C. Zhang, C. Ye, J.-H. Li, S. Zhou, L. Zhu, X.-B. Li, C.-H. Tung and L.-Z. Wu, Cobaloximes: selective nitrite reduction catalysts for tandem ammonia synthesis, *Energy Environ. Sci.*, 2023, **16**, 1590-1596.
4. J. Sun, D. Alam, R. Daiyan, H. Masood, T. Zhang, R. Zhou, P. J. Cullen, E. C. Lovell, A. Jalili and R. Amal, A hybrid plasma electrocatalytic process for sustainable ammonia production, *Energy Environ. Sci.*, 2021, **14**, 865-872.
5. A. Wu, J. Yang, B. Xu, X.-Y. Wu, Y. Wang, X. Lv, Y. Ma, A. Xu, J. Zheng, Q. Tan, Y. Peng, Z. Qi, H. Qi, J. Li, Y. Wang, J. Harding, X. Tu, A. Wang, J. Yan and X. Li, Direct ammonia synthesis from the air via gliding arc plasma integrated with single atom electrocatalysis, *Appl. Catal., B*, 2021, **299**, 120667.
6. Z. Meng, J.-X. Yao, C.-N. Sun, X. Kang, R. Gao, H.-R. Li, B. Bi, Y.-F. Zhu, J.-M. Yan and Q. Jiang, Efficient ammonia production beginning from enhanced air activation, *Adv. Energy Mater.*, 2022, **12**, 2202105.
7. J. Zheng, H. Zhang, J. Lv, M. Zhang, J. Wan, N. Gerrits, A. Wu, B. Lan, W. Wang, S. Wang, X. Tu, A. Bogaerts and X. Li, Enhanced NH<sub>3</sub> synthesis from air in a plasma tandem-electrocatalysis system using plasma-engraved N-doped defective MoS<sub>2</sub>, *JACS Au*, 2023, **3**, 1328-1336.
8. N. Q. Tran, L. T. Duy, D. C. Truong, B. T. Nguyen Le, B. T. Phan, Y. Cho, X. Liu and H. Lee, Efficient ammonia synthesis via electroreduction of nitrite using single-atom Ru-doped Cu nanowire arrays, *Chem. Commun.*, 2022, **58**, 5257-5260.
9. S. Liu, L. Cui, S. Yin, H. Ren, Z. Wang, Y. Xu, X. Li, L. Wang and H. Wang, Heterointerface-triggered electronic structure reformation: Pd/CuO nano-olives motivate nitrite electroreduction to ammonia, *Appl. Catal., B*, 2022, **319**, 121876.
10. X. He, X. Li, X. Fan, J. Li, D. Zhao, L. Zhang, S. Sun, Y. Luo, D. Zheng, L. Xie, A. M. Asiri, Q. Liu and X. Sun, Ambient electroreduction of nitrite to ammonia over Ni nanoparticle supported on molasses-derived carbon sheets, *ACS Appl. Nano Mater.*, 2022, **5**, 14246-14250.

11. G. Wen, J. Liang, L. Zhang, T. Li, Q. Liu, X. An, X. Shi, Y. Liu, S. Gao, A. M. Asiri, Y. Luo, Q. Kong and X. Sun, Ni<sub>2</sub>P nanosheet array for high-efficiency electrohydrogenation of nitrite to ammonia at ambient conditions, *J. Colloid Interface Sci.*, 2022, **606**, 1055-1063.
12. J. Chen, X. He, J. Li, X. Li, Z. Cai, Y. Luo, D. Zheng, T. Li, Y. Wang, Q. Liu, S. Sun, A. Farouk, M. S. Hamdy, X. Sun and B. Ying, Three-dimensional porous Co foam with nanosheets subunits for high-performance electrocatalytic nitrate-to-ammonia conversion, *Inorg. Chem. Front.*, 2023, DOI: 10.1039/D3QI00718A.
13. W. Wang and E. C. M. Tse, Enhanced nitrite electrovalorization to ammonia by a NiFe layered double hydroxide, *Eur. J. Inorg. Chem.*, 2022, **2022**, e202200291.
14. H. Yin, Z. Chen, S. Xiong, J. Chen, C. Wang, R. Wang, Y. Kuwahara, J. Luo, H. Yamashita, Y. Peng and J. Li, Alloying effect-induced electron polarization drives nitrate electroreduction to ammonia, *Chem. Catal.*, 2021, **1**, 1088-1103.
15. T. Zhu, Q. Chen, P. Liao, W. Duan, S. Liang, Z. Yan and C. Feng, Single-atom Cu catalysts for enhanced electrocatalytic nitrate reduction with significant alleviation of nitrite production, *Small*, 2020, **16**, 2004526.
16. Z.-Y. Wu, M. Karamad, X. Yong, Q. Huang, D. A. Cullen, P. Zhu, C. Xia, Q. Xiao, M. Shakouri, F.-Y. Chen, J. Y. Kim, Y. Xia, K. Heck, Y. Hu, M. S. Wong, Q. Li, I. Gates, S. Siahrostami and H. Wang, Electrochemical ammonia synthesis via nitrate reduction on Fe single atom catalyst, *Nat. Commun.*, 2021, **12**, 2870.
17. G.-F. Chen, Y. Yuan, H. Jiang, S.-Y. Ren, L.-X. Ding, L. Ma, T. Wu, J. Lu and H. Wang, Electrochemical reduction of nitrate to ammonia via direct eight-electron transfer using a copper-molecular solid catalyst, *Nat. Energy*, 2020, **5**, 605-613.
18. X. Fu, X. Zhao, X. Hu, K. He, Y. Yu, T. Li, Q. Tu, X. Qian, Q. Yue, M. R. Wasielewski and Y. Kang, Alternative route for electrochemical ammonia synthesis by reduction of nitrate on copper nanosheets, *Appl. Mater. Today*, 2020, **19**, 100620.
19. J. Li, G. Zhan, J. Yang, F. Quan, C. Mao, Y. Liu, B. Wang, F. Lei, L. Li, A. W. M. Chan, L. Xu, Y. Shi, Y. Du, W. Hao, P. K. Wong, J. Wang, S.-X. Dou, L. Zhang and J. C. Yu, Efficient ammonia electrosynthesis from nitrate on strained ruthenium nanoclusters, *J. Am. Chem. Soc.*, 2020, **142**, 7036-7046.
20. Z. Song, Y. Liu, Y. Zhong, Q. Guo, J. Zeng and Z. Geng, Efficient electroreduction of nitrate into ammonia at ultralow concentrations via an enrichment effect, *Adv. Mater.*, 2022, **34**, 2204306.

21. J. Qin, K. Wu, L. Chen, X. Wang, Q. Zhao, B. Liu and Z. Ye, Achieving high selectivity for nitrate electrochemical reduction to ammonia over MOF-supported RuxOy clusters, *J. Mater. Chem. A*, 2022, **10**, 3963-3969.
22. Q. Liu, L. Xie, J. Liang, Y. Ren, Y. Wang, L. Zhang, L. Yue, T. Li, Y. Luo, N. Li, B. Tang, Y. Liu, S. Gao, A. A. Alshehri, I. Shakir, P. O. Agboola, Q. Kong, Q. Wang, D. Ma and X. Sun, Ambient ammonia synthesis via electrochemical reduction of nitrate enabled by NiCo<sub>2</sub>O<sub>4</sub> nanowire array, *Small*, 2022, **18**, 2106961.
23. J. Wang, D. Wu, M. Li, X. Wei, X. Yang, M. Shao and M. Gu, Bismuth ferrite as an electrocatalyst for the electrochemical nitrate reduction, *Nano Lett.*, 2022, **22**, 5600-5606.
24. Y. Wang, W. Zhou, R. Jia, Y. Yu and B. Zhang, Unveiling the activity origin of a copper-based electrocatalyst for selective nitrate reduction to ammonia, *Angew. Chem. Int. Ed. Engl.*, 2020, **59**, 5350-5354.
25. F. Pang, Z. Wang, K. Zhang, J. He, W. Zhang, C. Guo and Y. Ding, Bimodal nanoporous Pd<sub>3</sub>Cu<sub>1</sub> alloy with restrained hydrogen evolution for stable and high yield electrochemical nitrogen reduction, *Nano Energy*, 2019, **58**, 834-841.
26. Z. Fang, P. Wu, Y. Qian and G. Yu, Gel-derived amorphous bismuth–nickel alloy promotes electrocatalytic nitrogen fixation via optimizing nitrogen adsorption and activation, *Angew. Chem. Int. Ed. Engl.*, 2021, **60**, 4275-4281.
27. J. Yao, Y. Zhou, J.-M. Yan and Q. Jiang, Regulating Fe<sub>2</sub>(MoO<sub>4</sub>)<sub>3</sub> by Au nanoparticles for efficient N<sub>2</sub> Electroreduction under ambient conditions, *Adv. Energy Mater.*, 2021, **11**, 2003701.
28. J. Duan, Y. Sun, S. Chen, X. Chen and C. Zhao, A zero-dimensional nickel, iron–metal–organic framework (MOF) for synergistic N<sub>2</sub> electrofixation, *J. Mater. Chem. A*, 2020, **8**, 18810-18815.
29. H. Cheng, L.-X. Ding, G.-F. Chen, L. Zhang, J. Xue and H. Wang, Nitrogen reduction reaction: molybdenum carbide nanodots enable efficient electrocatalytic nitrogen fixation under ambient conditions, *Adv. Mater.*, 2018, **30**, 1870350.
30. W. Ye, M. Arif, X. Fang, M. A. Mushtaq, X. Chen and D. Yan, Efficient photoelectrochemical route for the ambient reduction of N<sub>2</sub> to NH<sub>3</sub> based on nanojunctions assembled from MoS<sub>2</sub> Nanosheets and TiO<sub>2</sub>, *ACS Appl. Mater. Interfaces*, 2019, **11**, 28809-28817.
31. P. Wei, H. Xie, X. Zhu, R. Zhao, L. Ji, X. Tong, Y. Luo, G. Cui, Z. Wang and X. Sun, CoS<sub>2</sub> nanoparticles-embedded N-doped carbon nanobox derived from ZIF-67 for electrocatalytic N<sub>2</sub>-to-NH<sub>3</sub> fixation under ambient conditions, *ACS Sustainable Chem. Eng.*, 2020, **8**, 29-33.

32. H. Wang, Y. Li, D. Yang, X. Qian, Z. Wang, Y. Xu, X. Li, H. Xue and L. Wang, Direct fabrication of bi-metallic PdRu nanorod assemblies for electrochemical ammonia synthesis, *Nanoscale*, 2019, **11**, 5499-5505.
33. S. Kumari, S. Pishgar, M. E. Schwarting, W. F. Paxton and J. M. Spurgeon, Synergistic plasma-assisted electrochemical reduction of nitrogen to ammonia. *Chem. Commun.*, 2018, **54**, 13347–13350.
34. Y. Wang, M. Craven, X. Yu, J. Ding, P. Bryant, J. Huang and X. Tu, Plasma-enhanced catalytic synthesis of ammonia over a Ni/Al<sub>2</sub>O<sub>3</sub> catalyst at near-room temperature: Insights into the importance of the catalyst surface on the reaction mechanism. *ACS Catal.*, 2019, **9**, 10780–10793.
35. R. Hawtof, S. Ghosh, E. Guarr, C. Xu, R. Mohan Sankaran and J. N. Renner, Catalyst-free, highly selective synthesis of ammonia from nitrogen and water by a plasma electrolytic system. *Sci. Adv.*, 2019, **5**, eaat5778.
36. S. Z. Andersen, V. Čolić, S. Yang, J. A. Schwalbe, A. C. Nielander, J. M. McEnaney, K. Enemark-rasmussen, J. G. Baker, A. R. Singh and B. A. Rohr, A rigorous electrochemical ammonia synthesis protocol with quantitative isotope measurements. *Nature*, 2019, **570**, 504–508.
37. N. Lazouski, Z. J. Schiffer, K. Williams and K. Manthiram, Understanding continuous lithium-mediated electrochemical nitrogen reduction. *Joule*, 2019, **3**, 1127–1139.
38. J. Wang, L. Yu, L. Hu, G. Chen, H. Xin and X. Feng, Ambient ammonia synthesis via palladium-catalyzed electrohydrogenation of dinitrogen at low overpotential. *Nat. Commun.*, 2018, **9**, 1795.
39. S.-J. Li, D. Bao, M.-M. Shi, B.-R. Wulan, J.-M. Yan and Q. Jiang, Amorphizing of Au nanoparticles by CeO<sub>x</sub>-RGO hybrid support towards highly efficient electrocatalyst for N<sub>2</sub> reduction under ambient conditions. *Adv. Mater.*, 2017, **29**, 1700001.
40. L. Zhang, L.-X. Ding, G.-F. Chen, X. Yang, and H. Wang, Ammonia synthesis under ambient conditions: selective electroreduction of dinitrogen to ammonia on black phosphorus nanosheets. *Angew. Chem. Int. Ed. Engl.*, 2019, **58**, 2612–2616.
41. B. H. R. Suryanto, D. Wang, L. M. Azofra, M. Harb, L. Cavallo, R. Jalili, D. R. G. Mitchell, M. Chatti and D. R. MacFarlane, MoS<sub>2</sub> polymorphic engineering enhances selectivity in the electrochemical reduction of nitrogen to ammonia. *ACS Energy Lett.*, 2019, **4**, 430–435.
42. S. Hagen, R. Barfod, R. Fehrmann, C. J. H. Jacobsen, H. T. Teunissen, and I. Chorkendorff, Ammonia synthesis with barium-promoted iron–cobalt alloys supported on carbon. *J. Catal.*, 2003, **214**, 327–335.
